# Supplementary material for: Berberine inhibits carcinogenesis through antagonizing the ATX-LPA-LPAR2-p38-leptin axis in a mouse hepatoma model
Source: PubMed Central journal article supplement — Mol Ther Oncolytics. 2022 Aug 5;26:372–86. doi: 10.1016/j.omto.2022.08.001 (PMC9420352; doi:10.1016/j.omto.2022.08.001), 2022-08-05
Supplement: mmc1.pdf [file mmc1.pdf]

OMTO, Volume 26

## **Supplemental information**

**Berberine inhibits carcinogenesis**

**through antagonizing the ATX-LPA-LPAR2-p38-leptin**

**axis in a mouse hepatoma model**

**Gang Ren, Jiang-Hong Guo, Chen-Lin Feng, Yu-Wei Ding, Biao Dong, Yan-Xing Han, Yu-Huan Li, Lu-Lu Wang, and Jian-Dong Jiang**

**Supplementary Table 1** Serum levels were detected of 12 cytokines and metabolic hormones from male mice 1 month after DEN injection by employing the Luminex assay.

| Examinations  | sham              | normal chow                    | 0.04% BBR                      | 0.2% BBR                       |
|---------------|-------------------|--------------------------------|--------------------------------|--------------------------------|
| IL-1 $\beta$  | 458.3 $\pm$ 87.86 | 210.1 $\pm$ 15.43 <sup>#</sup> | 244.5 $\pm$ 24.59              | 345.9 $\pm$ 50.39 <sup>*</sup> |
| IL-6          | 7.99 $\pm$ 1.28   | 5.19 $\pm$ 0.845               | 7.05 $\pm$ 0.691               | 7.88 $\pm$ 0.998               |
| IL-18         | 1048 $\pm$ 136.9  | 924.3 $\pm$ 122.8              | 847.1 $\pm$ 58.04              | 1055 $\pm$ 106.3               |
| TNF- $\alpha$ | 1478 $\pm$ 205.6  | 1175 $\pm$ 130.8               | 1383 $\pm$ 94.3                | 2013 $\pm$ 237.6 <sup>**</sup> |
| M-CSF         | 3369 $\pm$ 160.5  | 3041 $\pm$ 101.1               | 3745 $\pm$ 156.8 <sup>**</sup> | 3439 $\pm$ 172.5               |
| G-CSF         | 53.76 $\pm$ 10    | 53.48 $\pm$ 8.754              | 83.88 $\pm$ 10.21              | 94.41 $\pm$ 17.32              |
| GM-CSF        | 14.66 $\pm$ 5.488 | 2.931 $\pm$ 0.6061             | 6.619 $\pm$ 1.266              | 5.528 $\pm$ 1.346              |
| leptin        | 132.9 $\pm$ 14.21 | 203.9 $\pm$ 38.99              | 175.1 $\pm$ 30.27              | 163.3 $\pm$ 25.49              |
| Adiponectin   | 5566 $\pm$ 247.2  | 5590 $\pm$ 221.5               | 5249 $\pm$ 205.5               | 5365 $\pm$ 146.3               |
| PAI-1         | 4270 $\pm$ 126.7  | 4036 $\pm$ 120.6               | 4032 $\pm$ 219.8               | 4236 $\pm$ 221.8               |
| Insulin       | 5092 $\pm$ 595.4  | 4320 $\pm$ 749.6               | 8509 $\pm$ 2009                | 7160 $\pm$ 1491                |
| Resistin      | 29472 $\pm$ 4009  | 15818 $\pm$ 1525 <sup>##</sup> | 36014 $\pm$ 2940 <sup>**</sup> | 28202 $\pm$ 2144 <sup>**</sup> |

1. The concentration unit was pg/mL, except adiponectin as ng/mL.

2. Data are expressed as mean  $\pm$  SEM, n=14-16. \*  $P$ <0.05, \*\*  $P$ <0.01, as compared to that of DEN model group fed on normal chow, using the one-way ANOVA. #  $P$ <0.05, ##  $P$ <0.01, as compared to that of sham treated group, using the unpaired t-test.

**Supplementary Table 2** Serum levels were detected of 12 cytokines and metabolic hormones from male mice 4 months after DEN injection by employing the Luminex assay.

| Examinations  | sham              | normal chow                    | 0.04% BBR                       | 0.2% BBR                        |
|---------------|-------------------|--------------------------------|---------------------------------|---------------------------------|
| IL-1 $\beta$  | 196.1 $\pm$ 29.4  | 658.4 $\pm$ 202.2 <sup>#</sup> | 212.9 $\pm$ 35.52 <sup>*</sup>  | 307.2 $\pm$ 57.79               |
| IL-6          | 3.75 $\pm$ 2.02   | 5.6 $\pm$ 2.22                 | 2.71 $\pm$ 0.378                | 5.13 $\pm$ 0.861                |
| IL-18         | 457.3 $\pm$ 111.6 | 352.2 $\pm$ 49.74              | 376.5 $\pm$ 22.91               | 352.1 $\pm$ 58.91               |
| TNF- $\alpha$ | 555.8 $\pm$ 108.6 | 639.9 $\pm$ 62.01              | 809.8 $\pm$ 104.5               | 1169 $\pm$ 201.1 <sup>*</sup>   |
| M-CSF         | 3972 $\pm$ 397.5  | 4237 $\pm$ 283.1               | 3662 $\pm$ 211.9                | 3714 $\pm$ 165.9                |
| G-CSF         | 30.59 $\pm$ 7.528 | 46.61 $\pm$ 9.042              | 27.34 $\pm$ 4.266 <sup>*</sup>  | 26.44 $\pm$ 2.058 <sup>*</sup>  |
| leptin        | 11834 $\pm$ 2134  | 2386 $\pm$ 495.8 <sup>##</sup> | 637.8 $\pm$ 147.1 <sup>**</sup> | 757.6 $\pm$ 273.1 <sup>**</sup> |
| Adiponectin   | 10770 $\pm$ 578.3 | 7946 $\pm$ 346 <sup>##</sup>   | 8149 $\pm$ 240.4                | 8192 $\pm$ 516.3                |
| PAI-1         | 3347 $\pm$ 149.7  | 5900 $\pm$ 425.1 <sup>##</sup> | 4421 $\pm$ 216.8 <sup>*</sup>   | 4621 $\pm$ 451.7 <sup>*</sup>   |
| Insulin       | 5511 $\pm$ 852.6  | 3402 $\pm$ 834.7               | 3703 $\pm$ 651.9                | 3664 $\pm$ 786.4                |
| Resistin      | 51523 $\pm$ 4838  | 24308 $\pm$ 2390 <sup>##</sup> | 16886 $\pm$ 1512 <sup>*</sup>   | 23133 $\pm$ 2168                |

1. The concentration unit was pg/mL, except adiponectin as ng/mL.

2. Data are expressed as mean  $\pm$  SEM. Sham, n=11; the other group, n=14-15. \*  $P$ <0.05, \*\*  $P$ <0.01, as compared to that of DEN model group fed on normal chow, using the one-way ANOVA.

<sup>#</sup>  $P$ <0.05, <sup>##</sup>  $P$ <0.01, as compared to that of sham treated group, using the unpaired t-test.

3. For GM-CSF, the level of most samples was under the detection limit and thus not shown.

**Supplementary Table 3** Serum levels were detected of 12 cytokines and metabolic hormones from male mice 6 months after DEN injection by employing the Luminex assay.

| Examinations  | sham              | normal chow                    | 0.04% BBR         | 0.2% BBR           |
|---------------|-------------------|--------------------------------|-------------------|--------------------|
| IL-1 $\beta$  | 388.3 $\pm$ 40.22 | 756 $\pm$ 93.4 <sup>##</sup>   | 547.5 $\pm$ 83.47 | 663.5 $\pm$ 78.12  |
| IL-6          | 23.88 $\pm$ 3.519 | 24.42 $\pm$ 1.979              | 31.95 $\pm$ 7.565 | 35.03 $\pm$ 4.202  |
| IL-18         | 481.4 $\pm$ 90.53 | 463.1 $\pm$ 47.65              | 530.6 $\pm$ 59.5  | 488.5 $\pm$ 51.11  |
| TNF- $\alpha$ | 3736 $\pm$ 457.3  | 4984 $\pm$ 419.3               | 4093 $\pm$ 534.2  | 4947 $\pm$ 362.2   |
| M-CSF         | 4220 $\pm$ 1106   | 3512 $\pm$ 611.9               | 2408 $\pm$ 129.2  | 3166 $\pm$ 420     |
| G-CSF         | 126.3 $\pm$ 18.61 | 141.2 $\pm$ 39.37              | 102.8 $\pm$ 23.78 | 113 $\pm$ 35.3     |
| GM-CSF        | 31.95 $\pm$ 3.635 | 37.4 $\pm$ 3.974               | 36.18 $\pm$ 3.444 | 31.08 $\pm$ 3.843  |
| leptin        | 1433 $\pm$ 338.9  | 4461 $\pm$ 697.9 <sup>##</sup> | 2659 $\pm$ 542.5  | 2104 $\pm$ 352.1*  |
| Adiponectin   | 9369 $\pm$ 570.7  | 7558 $\pm$ 392.1 <sup>#</sup>  | 6938 $\pm$ 349.8  | 6236 $\pm$ 250.1*  |
| PAI-1         | 4098 $\pm$ 786.7  | 4785 $\pm$ 380.1               | 4541 $\pm$ 273.9  | 4083 $\pm$ 403.5   |
| Insulin       | 4615 $\pm$ 493.1  | 8791 $\pm$ 1297 <sup>##</sup>  | 10355 $\pm$ 2569  | 11673 $\pm$ 2144   |
| Resistin      | 35898 $\pm$ 3416  | 51256 $\pm$ 4502 <sup>#</sup>  | 36305 $\pm$ 3770* | 32938 $\pm$ 3600** |

1. The concentration unit was pg/mL, except adiponectin as ng/mL.

2. Data are expressed as mean  $\pm$  SEM, n=12-14. \*  $P$ <0.05, \*\*  $P$ <0.01, as compared to that of DEN model group fed on normal chow, using the one-way ANOVA. #  $P$ <0.05, ##  $P$ <0.01, as compared to that of sham treated group, using the unpaired t-test.

**Supplementary Table 4** Serum levels were detected of 12 cytokines and metabolic hormones from male mice 8 months after DEN injection by employing the Luminex assay.

| Examinations  | sham              | normal chow                     | 0.04% BBR                      | 0.2% BBR           |
|---------------|-------------------|---------------------------------|--------------------------------|--------------------|
| IL-1 $\beta$  | 492.2 $\pm$ 130.2 | 530.4 $\pm$ 81.3                | 302.8 $\pm$ 42.11*             | 322.9 $\pm$ 44.65* |
| IL-6          | 10.39 $\pm$ 4.723 | 26.06 $\pm$ 11.93               | 14.18 $\pm$ 3.271              | 41.8 $\pm$ 19.67   |
| IL-18         | 261.9 $\pm$ 46.32 | 503.2 $\pm$ 42.68 <sup>##</sup> | 517.8 $\pm$ 66.56              | 397.4 $\pm$ 62.25  |
| TNF- $\alpha$ | 1551 $\pm$ 422.5  | 2180 $\pm$ 253.9                | 1370 $\pm$ 130.9               | 1803 $\pm$ 361.2   |
| M-CSF         | 4617 $\pm$ 574.6  | 5154 $\pm$ 547.2                | 6639 $\pm$ 365.6               | 6628 $\pm$ 515     |
| G-CSF         | 104.7 $\pm$ 16.36 | 137.3 $\pm$ 26.42               | 71.67 $\pm$ 8.948*             | 69.27 $\pm$ 9.023* |
| leptin        | 15145 $\pm$ 3872  | 11622 $\pm$ 1924                | 9906 $\pm$ 2025                | 6859 $\pm$ 1375    |
| Adiponectin   | 6073 $\pm$ 391.6  | 4428 $\pm$ 297.1 <sup>##</sup>  | 5912 $\pm$ 295.9 <sup>**</sup> | 5353 $\pm$ 377.3   |
| PAI-1         | 6403 $\pm$ 1015   | 13839 $\pm$ 2747 <sup>#</sup>   | 6286 $\pm$ 487.2 <sup>**</sup> | 8702 $\pm$ 845.8   |
| Insulin       | 6715 $\pm$ 1250   | 8659 $\pm$ 1351                 | 8467 $\pm$ 1701                | 9335 $\pm$ 1424    |
| Resistin      | 64781 $\pm$ 7993  | 56518 $\pm$ 4364                | 52211 $\pm$ 5717               | 44932 $\pm$ 4530   |

1 The concentration unit was pg/mL, except adiponectin as ng/mL.

2 Data are expressed as mean  $\pm$  SEM. Sham, n=13; the other group, n=23-24. \*  $P$ <0.05, \*\*  $P$ <0.01, as compared to that of DEN model group fed on normal chow, using the one-way ANOVA.

#  $P$ <0.05, ##  $P$ <0.01, as compared to that of sham treated group, using the unpaired t-test.

3. For GM-CSF, the level of most samples was under the detection limit and thus not shown.

**Supplementary Table 5** Primers used in real-time RT PCR

| Species | Gene names     |       | Primer sequences (5'→3') |
|---------|----------------|-------|--------------------------|
| Mouse   | ATX            | left  | tggcttacgtgacattgagg     |
|         |                | right | agtgggtagggacaggaatagag  |
|         | LPAR2          | left  | tctccgcttgactggat        |
|         |                | right | gccgatggtctcgtttagt      |
|         | leptin         | left  | cccaaatgtgctgcagatag     |
|         |                | right | ccagcagatggaggaggtc      |
|         | $\beta$ -actin | left  | ccaaccgtgaaaagatgacc     |
|         |                | right | accagaggcatacagggaca     |
| Human   | LPAR2          | left  | ccgctaccgagagaccac       |
|         |                | right | tgtccagcagaccacgaac      |
|         | leptin         | left  | cagctgaacagccaaatgc      |
|         |                | right | cccctcagctcatacatttc     |
|         | C/EBP $\alpha$ | left  | ggagctgagatcccgaca       |
|         |                | right | ttctaaggacaggcgtggag     |
|         | HIF1- $\alpha$ | left  | tttcaagcagtaggaattggaa   |
|         |                | right | gtgatgtagtagctgcatgatcg  |
|         | $\beta$ -actin | left  | tcaacaccccagccatgta      |
|         |                | right | agtacggccagaggtgtacg     |

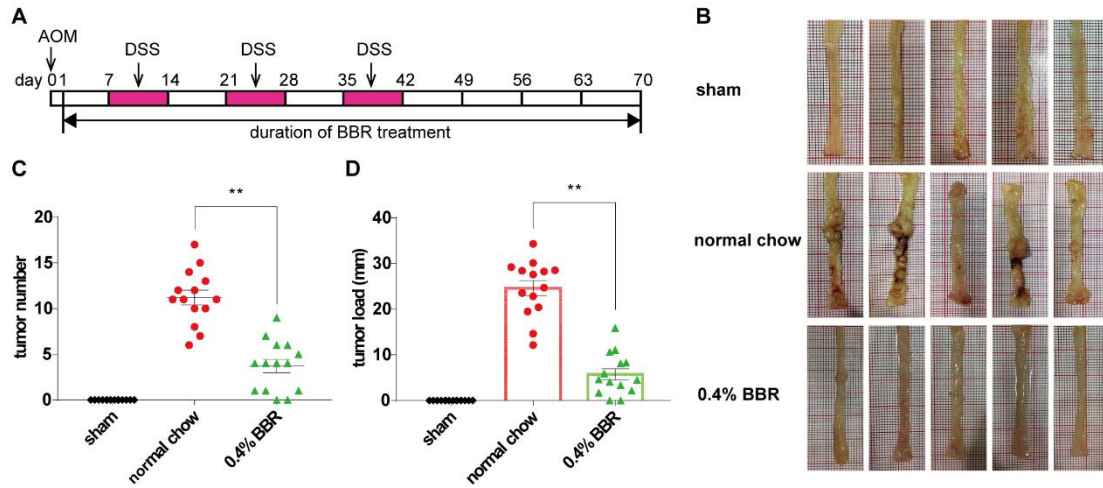

**Supplementary Figure 1** Berberine inhibited AOM-induced colon carcinogenesis. (A)

Scheme of the experimental design: AOM-induced colon carcinogenesis and BBR treatment (n=14). The day of AOM-injection was set as the “day 0”. (B) The AOM-induced tumors were reduced by BBR treatment (supplemented in diet, 0.4%, w/w) for 10 weeks. The representative images of colon were demonstrated for their group. (C, D) BBR significantly reduced the tumor number and load 10 weeks after AOM-injection in the mice. Statistics was done for the whole group (n=14), and data were expressed as the mean ± SEM. \*\*  $P < 0.01$ , BBR treated group versus AOM model group.

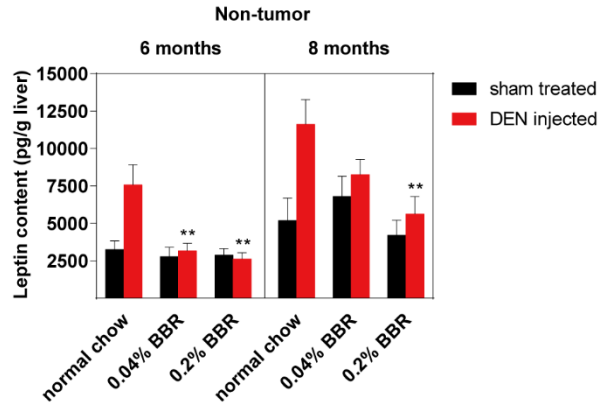

**Supplementary Figure 2** Berberine reduced the leptin content in DEN-injected but not sham treated mice. Liver leptin content was detected by ELISA assay of non-tumor liver tissue from male mice sacrificed at 6 and 8 months after DEN-injection, respectively. Values were the mean  $\pm$  SEM (n=5). \*  $P < 0.05$ , \*\*  $P < 0.01$  VS that of the DEN model group fed with normal chow.



## **Methods**

### **Animal studies**

Azoxymethane (AOM, purity over 98%, A5486) was purchased from Sigma-Aldrich Co. LLC (St. Louis, MO). Dextran Sulfate Sodium Salt (DSS, purity over 99%, #0216011080) was purchased from MP Biomedicals Co., Ltd (Shanghai, China). To generate AOM-induced colon tumors, 10-week-old C57BL/6 mice were subjected to single intraperitoneal injection with AOM (10 mg kg<sup>-1</sup> of body weight). On the next day, the mice were randomly grouped and fed with either normal chow diet (Keao Xieli Feed Co., Ltd, Beijing, China) or the diet supplement with BBR (0.4%, w/w). DSS was supplemented in the drinking water (1%, w/v) at the 2nd, 4th and 6th week of the experiment period. Mice were sacrificed to learn BBR's effect on colon carcinogenesis at the end of 10 weeks after AOM injection. All visible tumors were counted on the surface of colon, and the diameter of each tumor was measured using a sliding caliper. The tumor load was calculated through multiplying the tumor number by the average diameter per mouse, as reported previously (1).

### **Reference**

1. Neufert C, Heichler C, Brabletz T, Scheibe K, Boonsanay V, Greten FR, *et al.* Inducible mouse models of colon cancer for the analysis of sporadic and inflammation-driven tumor progression and lymph node metastasis. *Nat Protoc* 2021;16(1):61-85.
